# Supplementary material
Source: PubMed Central journal article supplement (PMC11261745)
Supplement: NIHMS2007439-supplement-SI.pdf [file NIHMS2007439-supplement-SI.pdf]

# Supporting Information

## Purification of DNA nanoparticles using photocleavable biotin tethers

Heather R. Everson,<sup>a†</sup> Kayla Neyra,<sup>a†</sup> Dylan V. Scarton,<sup>b,c</sup> Soumya Chandrasekhar,<sup>d</sup> Christopher Green,<sup>e</sup> Thorsten-Lars Schmidt,<sup>d</sup> Igor L. Medintz,<sup>e</sup> Remi Veneziano,<sup>\*c,f</sup> and Divita Mathur<sup>\*a</sup>

<sup>a</sup>. Department of Chemistry, Case Western Reserve University, Cleveland OH 44106.

<sup>b</sup>. College of Science, Interdisciplinary Program in Neuroscience, George Mason University, Fairfax VA 22030.

<sup>c</sup>. Institute for Advanced Biomedical Research, Manassas VA 20110.

<sup>d</sup>. Department of Physics, Kent State University, Kent OH 44240.

<sup>e</sup>. Center for Bio/Molecular Science and Engineering, US Naval Research Laboratory, Washington DC 20375.

<sup>f</sup>. College of Engineering and Computing, Department of Bioengineering, George Mason University Manassas, VA 20110.

<sup>\*</sup>[rvenezia@gmu.edu](mailto:rvenezia@gmu.edu), [dxm700@case.edu](mailto:dxm700@case.edu).

† Equal contribution.

### Table of Contents

| Title                                                                       | Page |
|-----------------------------------------------------------------------------|------|
| Quantification estimate of aPCR scaffold recovery                           | S2   |
| DNA origami 48 helix bundle (48hb) design and staples                       | S2   |
| UV Photocleavable string of lights setup                                    | S8   |
| Effect of different bead amounts on 6 helix bundle (hb) and PB purification | S9   |
| Yield estimate for aPCR-generated scaffold                                  | S10  |
| Comparison of PC-biotin purification method with existing techniques        | S10  |
| 48hb purification using a longer PC-biotin linker                           | S12  |
| References                                                                  | S13  |

**QUANTIFICATION ESTIMATE OF aPCR SCAFFOLD RECOVERY.** We performed 23 individual aPCR reactions of 50  $\mu$ L each by using the OneTaq enzyme to produce ssDNA scaffold at a length of 1,644 nucleotides from the M13mp18 phage template as previously described.<sup>1</sup> We purified 20 of these tubes by running them on a 75 mL, 1.2% low-melt agarose gel at 100 volts for 30 minutes and then recovered the ssDNA via the Zymoclean Gel DNA Recovery Kit (#D4008). From the remaining 3 unpurified tubes, a portion was run alongside known amounts of purified sample in a 40 mL, 1.2% high-melt agarose gel at 100 volts for up to 30 minutes. Finally, we measured the individual ssDNA band brightness with the ImageJ Rectangle & Measurements Tools to create a standard curve from the known purified samples and estimate the ssDNA concentration from the unpurified sample.

### **DNA NANOSTRUCTURES DESIGN AND BIOTIN SITE SELECTION**

**48hb Design.** The 48 helix bundle (48hb) was created using caDNA2.<sup>2</sup> Structure file will be made available on nanobase.org and the cross-section helix layout (derived from caDNA2) is shown in **Figure S1**. The .JSON file was converted to a .PDB version using CanDo<sup>3</sup> and visualized in UCSF Chimera<sup>4</sup> to identify staple sites that would be PC-biotin modified. All sequences are available in **Table S2**.

**6hb and PB Design.** The other two structures were used using published works by Oktay et al.<sup>1</sup> Staples to be modified with PC-Biotin were identified in the same manner.

Choice of PC-Biotin staples were driven mainly by the accessibility of the staples in 3D atomic models. The staples chosen to tag with PC-Biotin were based on whether the 5' end of the staple strand was facing outward in the middle of a face or on the structure edge of 48hb. Five thymine residues were added to the beginning of the staple sequence to provide biotin/streptavidin binding flexibility.

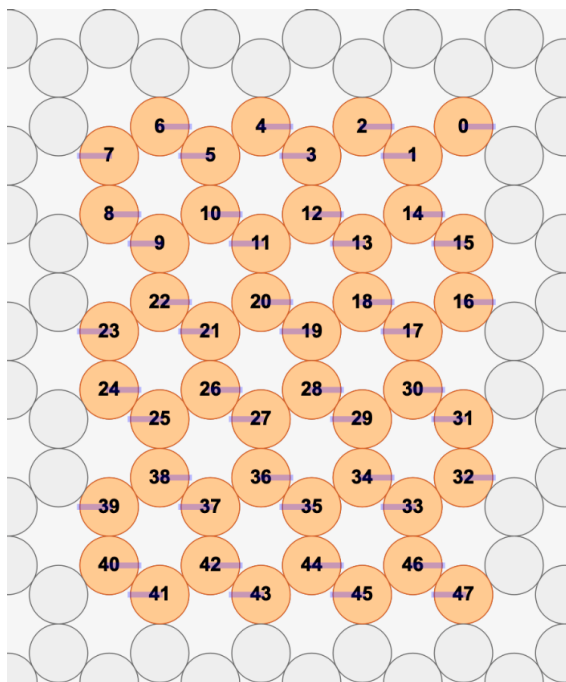

**Figure S1: Cross sectional helix layout of the 48hb.**

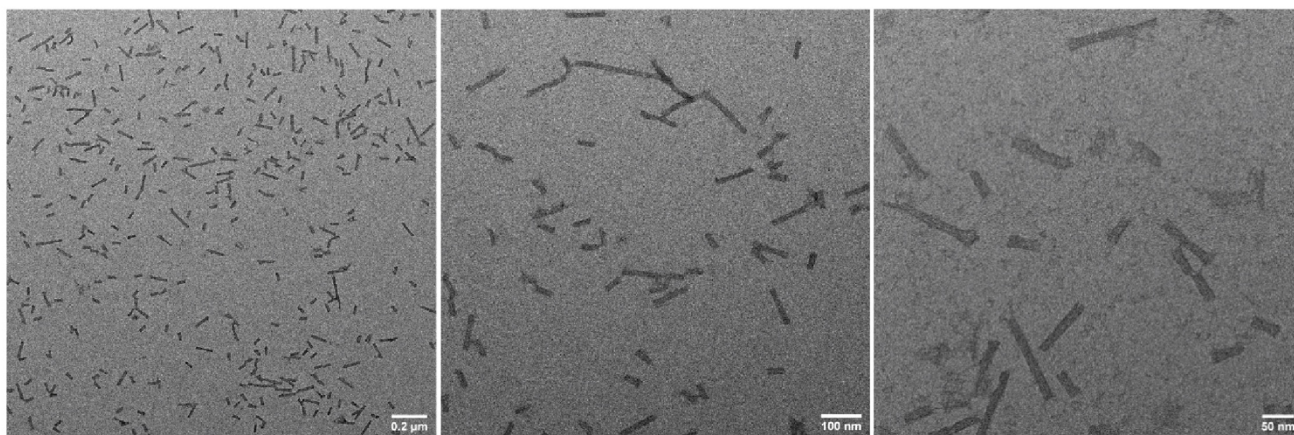

Figure S2: Representative TEM images of crude 48hb.

### Photocleavable biotin modified staples for the 48hb.

Table S1: PC-Biotin staple sequences

| Structure        | Name                        | Sequence (5' -> 3')                                                        |
|------------------|-----------------------------|----------------------------------------------------------------------------|
| 48hb             | 48hb_128_PCBio (corner)     | /5PCBio/TTTTTTTGCTCAGTACTGTATCAGCCCAATCCTGTAGTAAACAACGAA                   |
|                  | 48hb_106_PCBio (face)       | /5PCBio/TTTTTAATACCGATATACCTTTTCAAGCGCCATTTCGAAA                           |
| 6hb              | 6hb-1[2]-PCBio              | /5PCBio/GTCAAAGGGCGAAAAACCGTCTA                                            |
|                  | 6hb-5[238]-PCBio            | /5PCBio/TTTTTGTCAAAGGGCGAAAAACCGTCTA                                       |
| PB               | PB-17-PCBio                 | /5PCBio/GATTTTCAACCGCCTGCAACAGTGCCACGCT                                    |
|                  | PB-24-PCBio                 | /5PCBio/AAAACAGAACATTTTGACGCTCAATCGTCTG                                    |
| 48hb-long linker | 48hb_128_PCBioTE G (corner) | /5BiotinTEG/iSp18//iSpPC/TTTTTTTGCTCAGTACTGTATCAGCCCAATCC TGTAGTAAACAACGAA |
|                  | 48hb_106_PCBio TEG (face)   | /5BiotinTEG/iSp18//iSpPC/TTTTTAATACCGATATACCTTTTCAAGCGCCA TTCGAAA          |

Table S2: 48hb staple sequences

| Name    | Start   | Sequence                                           | Length |
|---------|---------|----------------------------------------------------|--------|
| 48hb_2  | 45[102] | CACCCGCCACAGAACCGTTGAGATCCTTATGCGAT                | 35     |
| 48hb_3  | 5[108]  | GGGTCACAATTCAGGTCGACTCTAGCCAGGGTTGGGAAGTAGTTTGTTTG | 50     |
| 48hb_4  | 15[46]  | ATTACGTTATATTTGAGCAGTTGAAAAGCATAGAAGATTAGTCTTGGG   | 48     |
| 48hb_6  | 0[93]   | GGACTCCAACGCAGGCGAAAATCCTATTTAAGTCATTGTTG          | 41     |
| 48hb_9  | 3[129]  | TCACGGGAAACCTAACTCTGTGTGACCGGGTACCG                | 35     |
| 48hb_12 | 17[101] | GTAAGCTATTTCTGAGAGTCTGGAATTGTATTTTT                | 36     |
| 48hb_15 | 41[94]  | GTTTATCAGCTCTCCAAAAAGAGGATTGTGTATCGTCAGGTAATAATAA  | 50     |
| 48hb_19 | 17[59]  | AGTATGAATAAGATGGCAATTCATCCGTATTAAGACTTTTCTGGTCTCAA | 50     |
| 48hb_21 | 15[88]  | CAGATTGTAAACGTTTCGAACGTGGTCAAAGGGCG                | 35     |
| 48hb_23 | 47[59]  | CTGAAACATGACGTCATATCTCTGAAGAGCCGCGCCACCAGCG        | 43     |

|          |          |                                                    |    |
|----------|----------|----------------------------------------------------|----|
| 48hb_24  | 8 [45]   | ACATTCTGGCCTACCTACCTTGCTGGTAATATGAGTAAAAGGT        | 43 |
| 48hb_28  | 2 [80]   | AGGAAGGGAAGAGCCGGCGACAATAATATAATCCTGGGCTAT         | 43 |
| 48hb_32  | 45 [60]  | CAGCATGGCTAAATAGCCTAACGAGCTATTTTTGCA               | 35 |
| 48hb_36  | 2 [59]   | GAGCGGGCGCTGATTTAGTGCCCGAATCAGATTGGAAGGGTTA        | 43 |
| 48hb_38  | 0 [50]   | GGCCACTAAGCCCCAGGGCGCACTATGGGGGATTTGTC             | 40 |
| 48hb_40  | 41 [115] | GTGAATTTCTTTAATTTTAAAACACATTTGTAATCCCCCAAAGAACAAA  | 50 |
| 48hb_43  | 43 [52]  | ACCCTCAGAACCCACCAGCAATGAAGGGAGAAAGCCGTTCAATAGCAAC  | 49 |
| 48hb_44  | 0 [113]  | AGTCCACTATGGTGGTAGCGGTCTGGGCGCGCATTA ACTG          | 40 |
| 48hb_45  | 22 [16]  | GCAGGCACAGGTATTAATCAGTGAAATCCTGAGAAGT              | 37 |
| 48hb_47  | 31 [46]  | AAGTCAGATAATCGAGAATTTACGAATGCAGCGAG                | 35 |
| 48hb_54  | 32 [23]  | AAAATAAGAAGGGTAATAGAATTGAAACGCATGATTAAAAATTCACGA   | 48 |
| 48hb_57  | 40 [24]  | TAGCACCATTAAAAAGGGTATGGT TTTCTTACCCGACAAACAT       | 43 |
| 48hb_59  | 0 [72]   | AAAAACCGTCCGGGGAAAAAGCGAACGTATACTAAACATTG          | 41 |
| 48hb_60  | 31 [88]  | TTGATACCACATTCAGAAGAAACAAAATT                      | 29 |
| 48hb_63  | 23 [24]  | CAAATATATTTATTACTAAAGCCAACAATAGAGAC                | 35 |
| 48hb_67  | 42 [107] | AATTGCTTTCCTTG CAGGGAGTTAAGCGAAAAATGCCATATCGCGCGGA | 49 |
| 48hb_69  | 5 [45]   | CATCTATCGGCATTTTGACGCTCAAATAAAAATAATGCGGTTATATGTCA | 50 |
| 48hb_71  | 32 [44]  | GAGAACGTCAAACACCATAAGAGGTTACCACAGT                 | 35 |
| 48hb_74  | 46 [44]  | AGGAAGCCAGACCAGAGCAGAGCCTCGGT CAGTAATCAAAT         | 41 |
| 48hb_77  | 30 [94]  | AGGATGAATTAGGTTAATTTCAACATGTAATCTTGACACCTCAGACCT   | 49 |
| 48hb_79  | 45 [123] | CAACCGTACTAAATCAAAGAACGAGGCTCATTATACCAACATTATAGCA  | 49 |
| 48hb_80  | 23 [45]  | CATCTTCTGACAGAATAAGCTTAATATAAGTTTTAGCAAGGCATTTGCC  | 49 |
| 48hb_81  | 40 [45]  | TAGAGCCAGCATTGAGGGTCACAATCGCTCAAGTAA               | 36 |
| 48hb_83  | 2 [92]   | CCCCAGCGATTGGAGAGGCGGTTTCGGATTAAATTCGTAAATGC       | 44 |
| 48hb_84  | 31 [109] | TTTTTCATCAGGAATTACAGAGGGTAAATATAGCAAAGTTTTAATGCG   | 48 |
| 48hb_85  | 46 [23]  | TTTCAAACAAGACAGGACACCACCGCGTTTGGAACCACAG           | 41 |
| 48hb_89  | 40 [87]  | TTGCGGAATTATCACCGTCCTTTAGCGCCTTTAATTGTACTT         | 42 |
| 48hb_90  | 42 [128] | TAAAAACAGCCGATATATTCGGTCGAGGGTACATTAAATCAAAGCCTAT  | 49 |
| 48hb_92  | 41 [60]  | ATCTTTCATCACGTAGAGATAGCCCTGTTTAAATATCCAATTTCAAATA  | 49 |
| 48hb_93  | 39 [137] | AGAGCATAACTTGATACCGATAGTAACTAAACAGCGATTA           | 40 |
| 48hb_94  | 45 [144] | TACTAGCCCGTCATTCAGT                                | 19 |
| 48hb_95  | 6 [80]   | AACATCACTTGAATACTTCATTAATCAAACCTAAATCATACCTTTTGAA  | 50 |
| 48hb_96  | 16 [44]  | GAAGATGAATAAATCGCTAATTACTGCTTCTGAGAAGAACTATATTT    | 48 |
| 48hb_98  | 15 [25]  | GGATGAGTAAAGAGCCGGGTTATCCAGCAGGCGG                 | 35 |
| 48hb_99  | 8 [87]   | CGACGGGCAGATTCACCATAAAACATTAACCTATCATAGCAAC        | 43 |
| 48hb_100 | 6 [59]   | AGAACTCAAACACGCAAACACCAGCCACCTTGATAACCTATTT        | 43 |
| 48hb_101 | 0 [30]   | ACCCAAATCACTAAATCGTCACGCATGCGCCACGCCAGGGC          | 41 |
| 48hb_102 | 9 [94]   | TTCATTCGCAAATGGTACATGCTGTAGCTCAAGCTTAATCTT         | 42 |
| 48hb_103 | 24 [129] | TGATAAGAGGTAAGTACGGTAGATTGGCGATCACTCCAGGAGTGAGCTG  | 49 |
| 48hb_106 | 23 [74]  | AATACCGATATACCTTTTCAAGCGCCATTCGAAA                 | 34 |
| 48hb_112 | 2 [38]   | CAAGTGTAGCGGGAACCCAAAAGTTATTATCATATCAAATTA         | 43 |
| 48hb_121 | 4 [122]  | TCGTGCCAGCTCAGGGTGATGTGAGTAAATCATTTTAGAAAAGGGTAGAA | 50 |
| 48hb_125 | 6 [101]  | CACAACATACGAGCCGGTAGTGCCAAGCTTGCCGTTGTACCA         | 42 |

|          |          |                                                   |    |
|----------|----------|---------------------------------------------------|----|
| 48hb_126 | 15 [130] | GAAAAAAGCCTTTTAACTTCATCAGCGCATCAGAT               | 35 |
| 48hb_127 | 6 [114]  | GCTGCCTAATCCAGCTTGTGGTGGGCAAGGGTTGTACGTT          | 41 |
| 48hb_128 | 47 [122] | TTGCTCAGTACTGTATCAGCCCAATCCTGTAGTAAACAACGAA       | 43 |
| 48hb_132 | 31 [67]  | CCCCGCGCCTTTATTTGAAAAATTCAACAATAAT                | 35 |
| 48hb_135 | 16 [107] | GTAAGATTCAACCCTCATAAATCGCAAAGAAATTT               | 35 |
| 48hb_136 | 16 [23]  | TTTAGATTTTTTTCATTTCAAACATTTAATTAGATAGCTCAAATCCTTT | 48 |
| 48hb_138 | 45 [82]  | ACCGCCACCTCTAAAGTTTTGACCTTA                       | 27 |
| 48hb_142 | 24 [108] | GATGGCTTAGACATGTTTGATACATGGCTGCGCCGCTTCGTAAAGCTGA | 49 |
| 48hb_150 | 5 [66]   | TAGCCCTGAGTAAATGGATTATTTACATTGCCAAT               | 35 |
| 48hb_151 | 16 [94]  | AGAGATCTACAATCTGAGTAATGTGTTT                      | 28 |
| 48hb_156 | 5 [24]   | CACCCAGAACAACGCTCATGGAAAAACAGAGTTTTGAAGCTGATGTAGA | 50 |
| 48hb_158 | 47 [81]  | GGCTGAGACTACCGCCACCCTCTCGAATAACTTATCCTGAA         | 41 |
| 48hb_161 | 33 [17]  | CCAATAAACAGCCGACTTGCGGGAGGGTATTCATTAAACAATC       | 43 |
| 48hb_163 | 42 [65]  | CGTAAGTTTGCACCGACTTGAGCCTTGACGGCCACGGATGAGAATGGCA | 49 |
| 48hb_164 | 4 [101]  | ATCGGCCAACGCGCGGAGTAGAAGCATAAAGTTGGTGCCGACC       | 43 |
| 48hb_166 | 42 [86]  | AAAAGGAGTCAGGTGGCCCTTTTTGTTAGCGTCCAATAAAGATT      | 44 |
| 48hb_168 | 45 [31]  | AATCCTCATTAAAGTGTACTTTGTTTCCTAATTAGCCTTAAATC      | 43 |
| 48hb_170 | 32 [73]  | TCTTACCAACGAGCCTTTATTAGACATAGCAAGTAAGCAAAT        | 43 |
| 48hb_171 | 43 [102] | TGAAGTTAGCTACTTAGTGGCTGAGCCAAAAGTTGAGATAG         | 41 |
| 48hb_173 | 16 [136] | TTCTAGCTGATGCCGGAGGCAAGGAATTATGACAATAAATGAA       | 43 |
| 48hb_176 | 2 [122]  | GAGTTGCAGCATCCGAAACAGGAAGGCAAACATGCCGGAGAGG       | 43 |
| 48hb_1   | 35 [39]  | ATATGAACAACGCACTCTAGAAGGAACGTCACCTACCATCATATTCCTG | 49 |
| 48hb_5   | 10 [128] | CGCGGTGCGGTAAGTTGGGTAACGAGGATCCAATTGTTATCC        | 42 |
| 48hb_7   | 6 [148]  | GGTCATAGCTGTTTCCACATTAACTCAGGAGTAA                | 34 |
| 48hb_8   | 8 [155]  | AGGGGGATGTGCTGCACGAATTCGT                         | 25 |
| 48hb_10  | 26 [44]  | CCACAGTAGGACACCGGAATCATATAGTTAATGTAAATTGGCTATAAAA | 49 |
| 48hb_11  | 26 [37]  | TAAAGACGCTGTAAATCAAATCTAAGGAATGGCGCGTTGG          | 41 |
| 48hb_13  | 19 [53]  | AACCATCCTAACAAGCATTAACTGAAAATGATTTGATGACCTATTATT  | 48 |
| 48hb_14  | 18 [90]  | AATGCAAGAAAGCCTCAGAGCGTAAAATACATAACCCTTCATC       | 43 |
| 48hb_16  | 27 [95]  | GGACGAAATCCGCGAGCAACAACCTAAAACGAAAAAGGACGTTAGTAAA | 49 |
| 48hb_17  | 35 [81]  | CCGAAACAGGAGACTAATGCAGATGTTTAGACTGGACCTTTA        | 42 |
| 48hb_18  | 35 [109] | AACCTGATAACAAAAGAAATACGTGACAGCATCGGAACGCTGAGGGAG  | 48 |
| 48hb_20  | 3 [8]    | CCCGCCTCTTTAGACAACACTACTGAGC                      | 26 |
| 48hb_22  | 30 [114] | AGAAAGAACTGTAGTAAATTGGGCGATATTCATAGGCCCGG         | 42 |
| 48hb_25  | 10 [58]  | AACTTAACCGGGAGGCCGATTAAATTGCTTTAAATCAAGATT        | 42 |
| 48hb_26  | 19 [8]   | GAAGATTGTCTTTTTTCCAAGTAATAT                       | 26 |
| 48hb_27  | 35 [8]   | GAGATAGCAGGTCGGCCTTGATATTTCAAACGGGGAAT            | 37 |
| 48hb_29  | 18 [58]  | CCAAAGTATTAATCCTTAGCTTGATATCAGGGCGAT              | 36 |
| 48hb_30  | 21 [116] | GGGAGTCAGATCATTGATCATCGCGAGGCGCCAGACAGTTCAGGGATAG | 49 |
| 48hb_31  | 38 [148] | AGACTTTTTGCAAACATAAATCACAAATTTCTAC                | 32 |
| 48hb_33  | 46 [155] | ATATAAGTACGTAAACT                                 | 18 |
| 48hb_34  | 10 [37]  | CAGAGAGTCTTAGACAGGAACGGTGCTACAGTGAGGAATCAA        | 42 |
| 48hb_35  | 26 [58]  | GAGGTGAATTTGAGTGACTGAACCAGTTGGCGACGAGCAAG         | 41 |

|          |          |                                                    |    |
|----------|----------|----------------------------------------------------|----|
| 48hb_37  | 21 [18]  | AGCATTTTCCCTGAGAGTAAAATAGCGCTTATGCGCGTAACCAC       | 44 |
| 48hb_39  | 18 [37]  | AGGATAATACTAATTTTTAAAGGGCGTGAACCATC                | 35 |
| 48hb_41  | 13 [109] | TGTCGAGTAAAGGTCCTCCGGCACAAC                        | 28 |
| 48hb_42  | 34 [30]  | AGAACGATTTTGGTAATATGCCCCCTGCCTATTTTCGGAATAC        | 42 |
| 48hb_46  | 29 [130] | ACACTTTTGCTCAAATGACCCTGAGAACCAGTTT                 | 34 |
| 48hb_48  | 13 [32]  | TAGCGAATTACAGGTTTCTTATCCGTTTTGATGCCAGTTACA         | 42 |
| 48hb_49  | 21 [130] | AAGCGAACGAGTGTCTGGAAGTTTTGCTCCACCGAACATGAGGTGAC    | 49 |
| 48hb_50  | 26 [121] | TATCGCGAGCTCATACTAGATGGACATTAAGTTTTTCAGA           | 41 |
| 48hb_51  | 37 [46]  | ATGTATTTTGAGGGAAGGTAAATAATTTGGGGTAGCGACAGA         | 42 |
| 48hb_52  | 32 [148] | GGCTTGCCCCGTTGGGAAGAAAAAT                          | 25 |
| 48hb_53  | 11 [67]  | ATAAATACCGATAGCCCGTCACACGACCAGTTCGTCTGAGA          | 41 |
| 48hb_55  | 13 [53]  | TAGAGTTACAATACAGTAAGCAAAAATTAGTTGCGTCTTTCCA        | 42 |
| 48hb_56  | 24 [155] | TAGAGAGTACCTTTAACATTCCATA                          | 25 |
| 48hb_58  | 13 [74]  | ACAGCCTGATCATCGGGATCATTAGCTACAATTTTAAATCA          | 42 |
| 48hb_61  | 21 [53]  | ATAGCATTTTAAACGCGCGAACAAACAAGAAAACCACCAATGGAAAGCG  | 49 |
| 48hb_62  | 40 [155] | AACAACCATCGCCCACGGCTTTGAG                          | 25 |
| 48hb_64  | 18 [135] | AACACAGTCACGGAACAGTCAGGATGACGAGAAACACCCGTAACAGAAC  | 49 |
| 48hb_65  | 34 [148] | TTGAAAGAGAACCCTCGAACTAAAATCACCAT                   | 32 |
| 48hb_66  | 23 [7]   | ACGCGAGAGTATCAATACAAATACCAG                        | 27 |
| 48hb_68  | 42 [155] | GAAAGGAAGTGCGCCGAC                                 | 18 |
| 48hb_70  | 33 [8]   | TATCCCTCAGTGCCAGTGCCCGTATAAACAGTTAAAGT             | 38 |
| 48hb_72  | 4 [148]  | TGCCCCGTTTTCCAGTCCAGTGAGGCCAGCTCAATAGGTTTC         | 41 |
| 48hb_73  | 18 [16]  | TACATAGATTCAATTATCTAAAGCAAGTTTTTTGGGGT             | 37 |
| 48hb_75  | 11 [95]  | GTAAATTAAGCAATAAAAGCAATAACCTGTTTCATCAAAGTGC        | 42 |
| 48hb_76  | 26 [100] | TTGTAGCTATTTAGCAAATGGGATCAACCCGTGCGTATCACGCTGGTTTG | 50 |
| 48hb_78  | 37 [67]  | ACAAAAGACAAAATTATTCATTAAGGTGGATATAAAAACAAGCC       | 45 |
| 48hb_82  | 26 [65]  | TTACGCCATATAAGGCGTTAAATACTAAATTAGGTTGGCGAACTGAACG  | 49 |
| 48hb_86  | 10 [30]  | GAGCAAATGAGTCGCTACAAGAAAAGAAACCCAAGTACAGTC         | 42 |
| 48hb_87  | 9 [109]  | TGTTTTCCAGTCACGAATGCCTGCCA                         | 27 |
| 48hb_88  | 27 [137] | AAAAAAGTACAAGGGAATACAACGAGGAACCCATG                | 35 |
| 48hb_91  | 5 [8]    | TTATAACACCGCCTGCCACGCTTAGA                         | 26 |
| 48hb_97  | 34 [122] | CAGATAGTAAGTACAGGTGAGAAAGAAATTAAAGAGAATCGAT        | 43 |
| 48hb_104 | 0 [148]  | AGATAGGGTTGAGTGTGTTCCAAAATCCCTGGCCCTGTTT           | 40 |
| 48hb_105 | 22 [148] | TTGATTCCCCCTATTTATCGGCTTGCCTTGC                    | 32 |
| 48hb_107 | 47 [94]  | CAAGAGAAGGATTAGGATTTTAGTACCTCATTCCCTCATATTTTCTTGAA | 50 |
| 48hb_108 | 34 [128] | GGTCAATCATAACGGAGTCATCTTAAGTTTCGCAACGGCTAC         | 42 |
| 48hb_109 | 25 [94]  | CAAACACGAAGGCACCATCGTCACCCTCAGCAAGGCCGTGC          | 42 |
| 48hb_110 | 21 [109] | TCAACCATTATAAATATGCAACTACATTTTTTCGAGCTCGGGTAAATA   | 48 |
| 48hb_111 | 34 [89]  | AAGAAAACCTGCTCCATGTGTAACGACTCAGAGCCAC              | 38 |
| 48hb_113 | 28 [115] | TTGCCGAGGCACCAGGCGATTACCCAGGAGGTAGCGGGTT           | 42 |
| 48hb_114 | 36 [16]  | TAAACGACGAAATCGGCGATGAAACAAT                       | 28 |
| 48hb_115 | 37 [74]  | TAAAGACTGTCTCAGAGCCTCGTCTTTCCAGCTCC                | 35 |
| 48hb_116 | 21 [8]   | TTGAAAAAGGTAATGTCCAGCGGAAT                         | 26 |

|          |          |                                                    |    |
|----------|----------|----------------------------------------------------|----|
| 48hb_117 | 25 [84]  | CGAAAGATGCTGAATACCGTGTGATAAATTTAACAGAAACGCTACA     | 46 |
| 48hb_118 | 7 [8]    | TTGCAAACCTGAAAATACGTAGACAAA                        | 27 |
| 48hb_119 | 16 [148] | GATATTC AACGTAAA ACTAGCATGT                        | 25 |
| 48hb_120 | 37 [31]  | TCCTCTTATTAGGAACCGCCTCCCTCCGCCGCCCA                | 36 |
| 48hb_122 | 19 [102] | AGCTATATTTTCATTTAAAAGCAAATGTTTGATTAAAGAACGT        | 42 |
| 48hb_123 | 30 [155] | TAATAAAACGTTTACCAG                                 | 18 |
| 48hb_124 | 37 [115] | CACTTTCACGTGTATGGGATTTTGCCATTCCAAGACGGTGTA         | 42 |
| 48hb_129 | 16 [78]  | GTTTGGATTATACTTCCCTTTTATGCT                        | 27 |
| 48hb_130 | 26 [84]  | AAGAGGGCGTCTGAGCAGTACACTAAACGGCGGATTGGAAAC         | 42 |
| 48hb_131 | 26 [72]  | ATGTAGATAAAAGAAAATAGCTATCACCTCATTTACCGTAGA         | 43 |
| 48hb_133 | 28 [155] | ATAAAAACCGAAAACGAG                                 | 18 |
| 48hb_134 | 10 [84]  | CAGGCAGCCTTTGATAATCAGAGCGGGAGACGTGCTATCAATAACAA    | 47 |
| 48hb_137 | 10 [23]  | TCAACAATATATAGAACCCTTCTGCAGGAAAAATATTACCGCCA       | 44 |
| 48hb_139 | 14 [155] | TATGTACCCTCAAAAATA                                 | 18 |
| 48hb_140 | 12 [155] | GTCTGGCCTGCCAGTTTG                                 | 18 |
| 48hb_141 | 39 [8]   | AAAGACCATTAGGAAACGTCACCAATCCATCTTACTGGCAATAA       | 45 |
| 48hb_143 | 19 [123] | AACTAAAATGCTCATTTCCAAAATCGGCAAGTTTGAACAAG          | 43 |
| 48hb_144 | 34 [16]  | CGCAACGGGTTAAGAACATTGCGTGCACGTACCAGAAGGAGC         | 42 |
| 48hb_145 | 26 [155] | CATAAATCACCAACAGGT                                 | 18 |
| 48hb_146 | 37 [137] | CCCGGAATTGCTTTCAACAGTTTCTACAAACCCGAACTGA           | 40 |
| 48hb_147 | 18 [148] | AAGCCTTTAAACGCCACGGTTGACAAAAGAAT                   | 32 |
| 48hb_148 | 28 [23]  | AATCAATAAATAAAGTACAGTATAGAAAAGCCTGTTTAAACTTAATC    | 49 |
| 48hb_149 | 39 [24]  | CATTCAACCGAAAATCACTCGATAGCAGCACCTAGCCCCTATT        | 43 |
| 48hb_152 | 2 [148]  | TTGCCCTTCACCGCCTTATAAATTAATCAGCGGTAATCCG           | 40 |
| 48hb_153 | 10 [155] | CGACGACAGACGCCAGCT                                 | 18 |
| 48hb_154 | 17 [8]   | AAAGAAGCGAGGCGAACCTCCCATAT                         | 26 |
| 48hb_155 | 20 [148] | TAGTAGCATTGCATCTTCCTGTAACGGGCAAC                   | 32 |
| 48hb_157 | 36 [148] | GCGCGAAACCAGTTCAAAAATAGATACTTTTG                   | 32 |
| 48hb_159 | 1 [8]    | GTGCCGATTTTTCGAAACCAAAACAG                         | 26 |
| 48hb_160 | 7 [136]  | AGCTAGGCGATGCCTCTTAATTCTGGTGGCATGGTCTTTCTTT        | 43 |
| 48hb_162 | 18 [65]  | TTGTTTGAATATATATGTATCAAACCGGCTTTAATGGTTTGA         | 42 |
| 48hb_165 | 37 [39]  | ACGGAAGGAATTCAGCTAGCATGTACAAAATGCAG                | 35 |
| 48hb_167 | 44 [155] | CGTCACCAGAGCGGAGTG                                 | 18 |
| 48hb_169 | 21 [32]  | TTAGAGAATACAACATGACCGAGGAGTTAAGCAGCATTATA          | 41 |
| 48hb_172 | 34 [135] | GATAAGCTGCGAATAGGCAGGCGGATAAGTGCCGTCGAGA           | 40 |
| 48hb_174 | 11 [137] | CCGTAACATCCCCTGTACGAGAGGCTATCATGACA                | 35 |
| 48hb_175 | 19 [81]  | ATGCGGATT CATAATATTTTGT TACTCCGTGGGAACCATTCCTCGGAA | 48 |
| 48hb_177 | 37 [8]   | AAAAGATT CATAAACCGGAAC CAGAGCGGTTGAGACCCACATGAG    | 45 |
| 48hb_178 | 28 [72]  | CAATCATCGTGAAGCGCACAGAGACAGTAAGAAGTATTAAGA         | 42 |

## UV PHOTOCLEAVAGE SETUP USING STRING OF LIGHTS

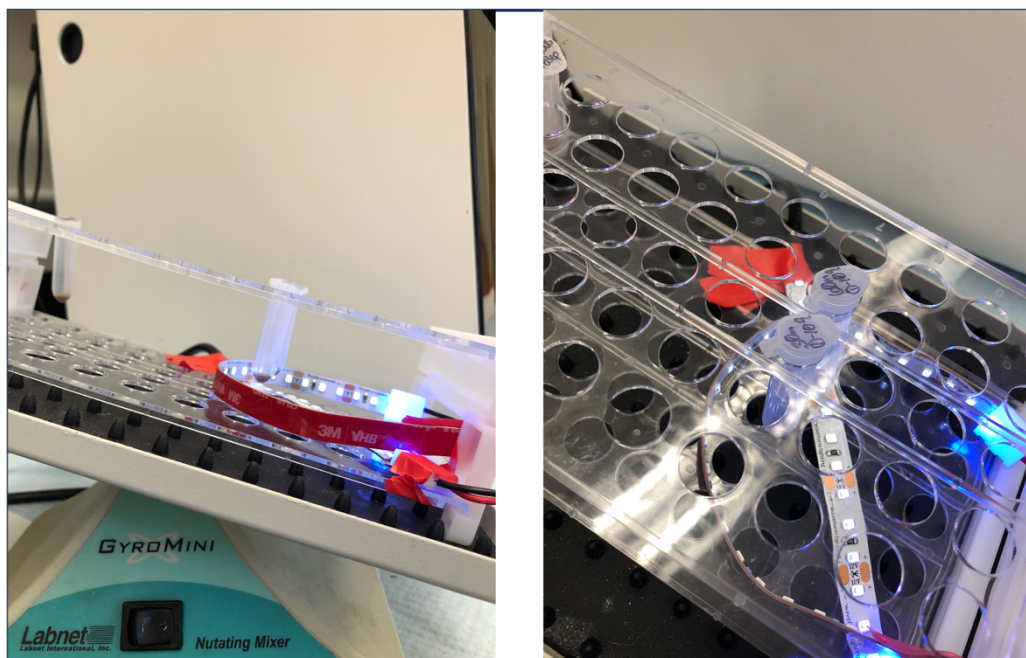

Figure S3: String of Lights for UV-photocleavage of the DNA NPs from the beads.



## EFFECT OF DIFFERENT BEAD AMOUNTS ON 6hb AND PB PURIFICATION

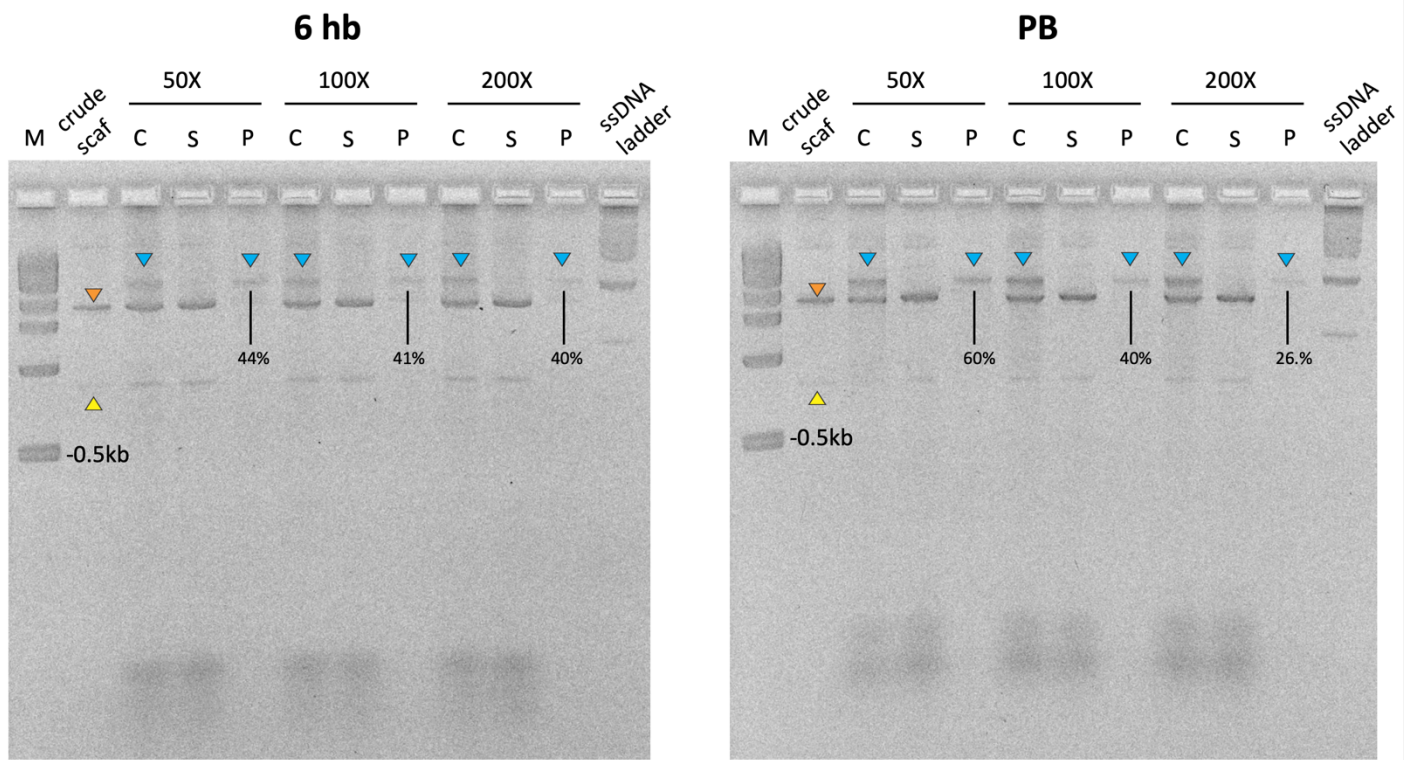

**Figure S4: Agarose gel electropherogram testing different bead dosage on 6hb and PB purification.** Color triangles represent: dsDNA byproduct (orange), ssDNA scaffold (yellow), and the formed PB NP (blue).

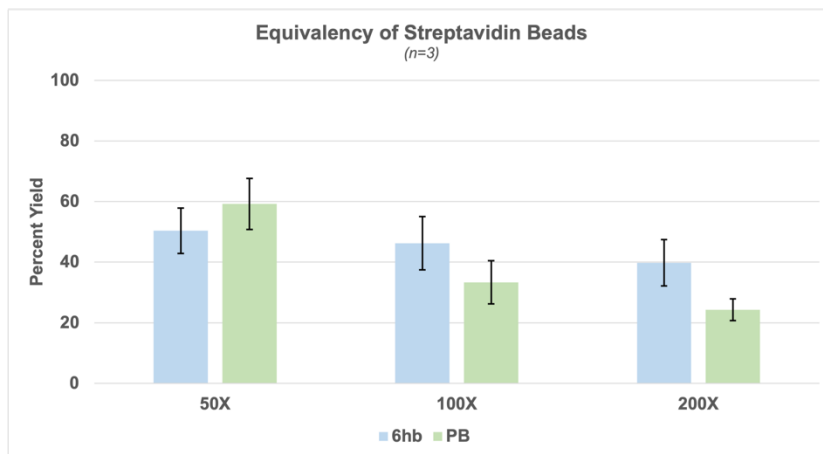

**Figure S5: Yield of purification for 6hb and PB assembled using crude scaffold.** Error bars represent standard deviation from the mean ( $n = 3$ ).

## YIELD OF aPCR-PURIFIED SCAFFOLD STRAND

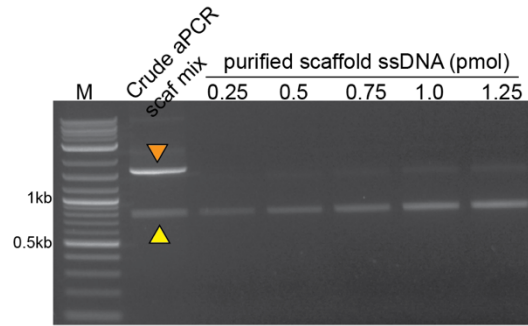

**Figure S6: Estimation of scaffold concentration in crude aPCR mix using standardized pure scaffold series.** Yellow triangle indicates scaffold and orange triangle indicates dsDNA by-product of the aPCR.

## COMPARISON OF PC-BIOTIN PURIFICATION METHOD WITH EXISTING TECHNIQUES

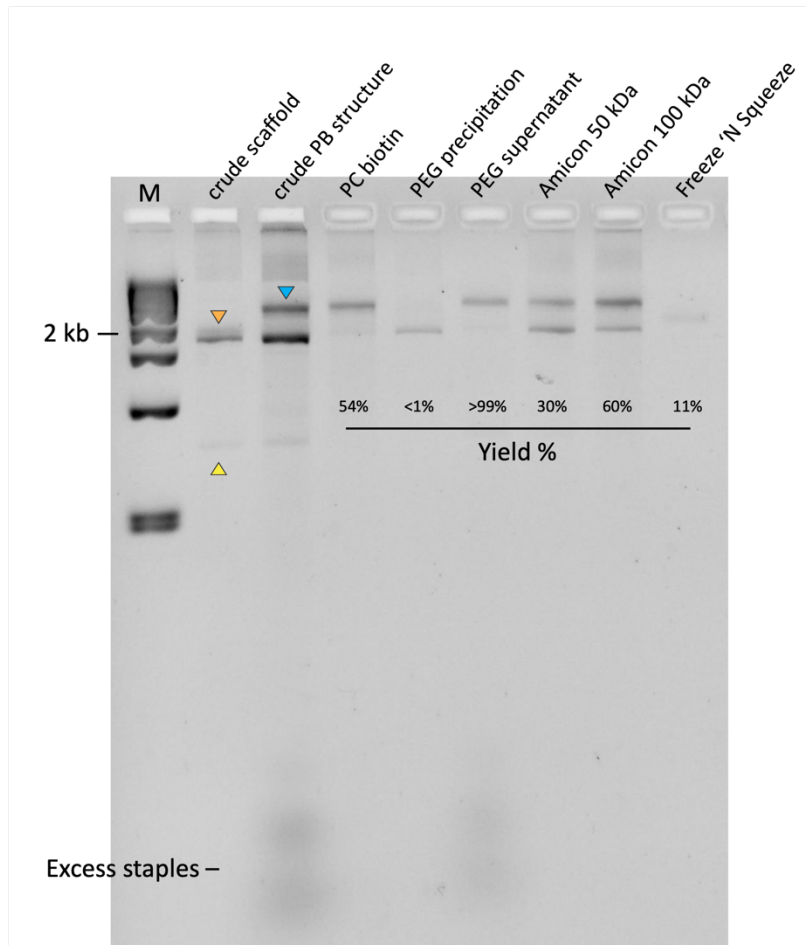

**Figure S7: Yield and quality of PB purification via commonly used techniques.** 2% agarose gel electropherogram showing PB purification using current method (PC biotin tag), PEG precipitation, two filter types of ultrafiltration, and gel extraction Freeze 'N Squeeze column. Color triangles represent: dsDNA byproduct (orange), ssDNA scaffold (yellow), and the formed PB NP (blue).

**Table S3: Broad differences between the PC-biotin based purification technique and other leading techniques.**

|                                   | <b>Time</b> | <b>Quality</b>                                                                     | <b>Requires concentration</b> | <b>Yield</b> | <b>Refs</b>      |
|-----------------------------------|-------------|------------------------------------------------------------------------------------|-------------------------------|--------------|------------------|
| <b>PC-Biotin</b>                  | 4 hours     | 1 step custom scaffolded DNA NP purification                                       | No                            | <90%*        | <b>This work</b> |
| <b>Precipitation</b>              | overnight   | Cannot remove dsDNA aPCR byproduct; May be challenging to purify wireframe DNA NPs | No                            | >90%**       | <b>5-6</b>       |
| <b>Ultrafiltration</b>            | 2 hours     | Cannot remove dsDNA aPCR byproduct                                                 | No                            | 20-80%       | <b>1, 7-9</b>    |
| <b>Gel-extraction</b>             | 2-3 hours   | Residual agarose particulates, variable yield                                      | Yes                           | < 20%        | <b>Figure S7</b> |
| <b>Biotin-strand displacement</b> | overnight   | Theoretically 1 step, requires DSD staple extensions                               | Yes                           | > 90%        | <b>9-10</b>      |

\*Longer PC-biotin linker with 50-fold beads. \*\*PEG precipitation on wireframe PB was 0% efficient but sufficient literature points to >90% efficacy of the technique to purify helix bundle DNA NPs. DSD = DNA strand displacement.

## 48HB PURIFICATION USING A LONGER PC-BIOTIN LINKER

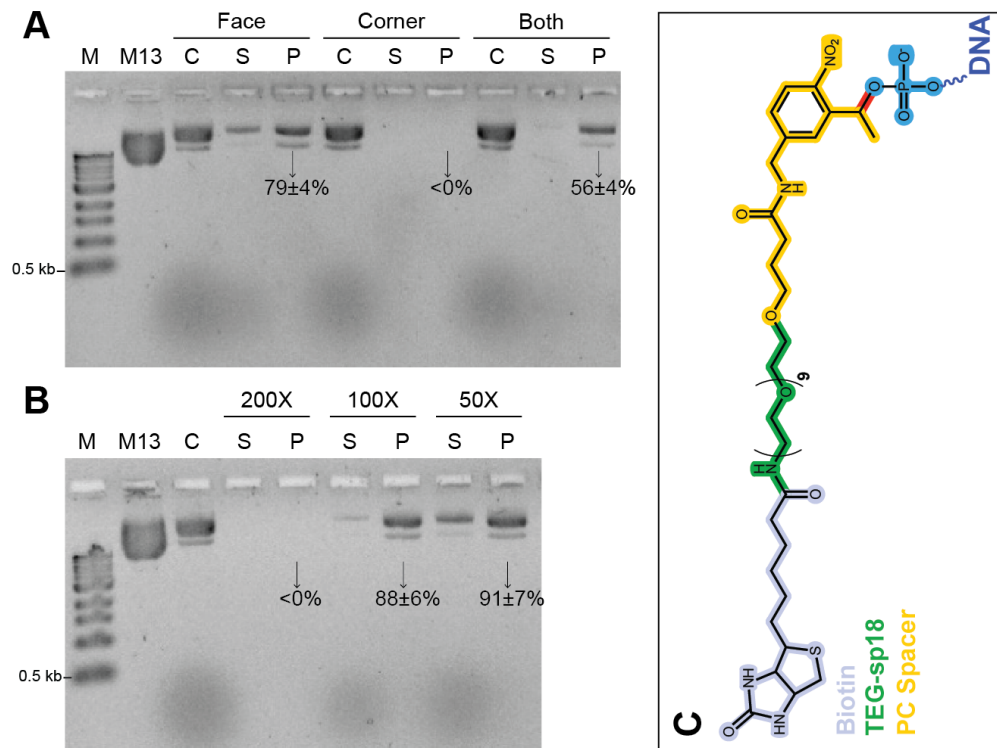

**Figure S8: Purification of 48hb using BiotinTEG-sp18-PCspacer linker.** 1% agarose gel electropherograms representing the yield of 48hb purification using a longer PC-biotin (referred to as PC-biotin-L) tether staples. (A) Gel separation and purification yield of 48hb when using either face or corner or both PC-biotin-L staples simultaneously and 200X BBC. Surprisingly, the face PC-biotin-L tether (staple 106 in **Table S1**) resulted in highest yield ~80%, even higher than when using both staples together. (B) Gel separation and purification of 48 hb (corner PC-biotin-L only) with 200-, 100-, 50-fold excess magnetic beads per PC-biotin-L staple. In this case, fewer beads lead to the highest yield of 91%. Sample abbreviations M13: scaffold only, C: Crude 48hb, S: supernatant, P: Photocleaved/purified 48hb. (C) Chemical formula of the PC-biotin-L tether. IDT formula: 5'-/BiotinTEG//sp18//PCspacer/. Standard deviation about the average yields were calculated from n = 3 samples.

## References:

1. Oktay, E.; Bush, J.; Vargas, M.; Scarton, D. V.; O'Shea, B.; Hartman, A.; Green, C. M.; Neyra, K.; Gomes, C. M.; Medintz, I. L.; Mathur, D.; Veneziano, R., Customized Scaffolds for Direct Assembly of Functionalized DNA Origami. *ACS Appl Mater Interfaces* **2023**, *15* (23), 27759-27773.
2. Douglas, S. M.; Marblestone, A. H.; Teerapittayanon, S.; Vazquez, A.; Church, G. M.; Shih, W. M., Rapid prototyping of 3D DNA-origami shapes with caDNAno. *Nucleic Acids Res* **2009**, *37* (15), 5001-6.
3. Castro, C. E.; Kilchherr, F.; Kim, D. N.; Shiao, E. L.; Wauer, T.; Wortmann, P.; Bathe, M.; Dietz, H., A primer to scaffolded DNA origami. *Nat Methods* **2011**, *8* (3), 221-9.
4. Pettersen, E. F.; Goddard, T. D.; Huang, C. C.; Couch, G. S.; Greenblatt, D. M.; Meng, E. C.; Ferrin, T. E., UCSF Chimera--a visualization system for exploratory research and analysis. *J Comput Chem* **2004**, *25* (13), 1605-12.
5. Stahl, E.; Martin, T. G.; Praetorius, F.; Dietz, H., Facile and scalable preparation of pure and dense DNA origami solutions. *Angew Chem Int Ed Engl* **2014**, *53* (47), 12735-40.
6. Lei, Y.; Mei, Z.; Chen, Y.; Deng, N.; Li, Y., Facile Purification and Concentration of DNA Origami Structures by Ethanol Precipitation. *ChemNanoMat* **2022**, *8* (7), e202200161.
7. Mathur, D.; Medintz, I. L., Analyzing DNA Nanotechnology: A Call to Arms For The Analytical Chemistry Community. *Anal Chem* **2017**, *89* (5), 2646-2663.
8. Neyra, K.; Everson, H. R.; Mathur, D., Dominant Analytical Techniques in DNA Nanotechnology for Various Applications. *Analytical Chemistry* **2024**, *96* (9), 3687-3697.
9. Shaw, A.; Benson, E.; Hogberg, B., Purification of functionalized DNA origami nanostructures. *ACS Nano* **2015**, *9* (5), 4968-75.
10. Ye, J.; Teske, J.; Kemper, U.; Seidel, R., Sequential Pull-Down Purification of DNA Origami Superstructures. *Small* **2021**, *17* (17), e2007218.
